# Supplementary material for: Inferring neural dynamics of memory during naturalistic social communication
Source: PubMed Central journal article supplement (PMC10849655; doi:10.1101/2024.01.26.577404), 2024-01-27
Supplement: media-1.pdf [file media-1.pdf]

2 **Supplementary Information for**  
3 **Inferring neural dynamics of memory during naturalistic social communication**  
4 **Rich Pang, Christa Baker, Mala Murthy, and Jonathan Pillow**

5 **This PDF file includes:**

6 SI References

## 7 Extended methods

8 **Neural data.** We fit our encoding models to 224 neural recordings obtained via calcium imaging, the majority of which were  
9 recently published in (1). Specific cell types were targeted using sparse, specific split-GAL4 lines and the fluorescent calcium  
10 indicator GCaMP6s. Imaging was performed one line at a time, i.e. only a single cell type was imaged in each experiment.  
11 Stimuli were presented in a block-randomized order with 10 s sine and pulse blocks (as well as a 10 s white noise block)  
12 interleaved with 20 s inter-stimulus intervals. All stimuli were presented through a speaker to a female fly head-fixed under a  
13 two-photon calcium imaging microscope. Fluorescence changes were then extracted from the resulting video. Only responses  
14 that were statistically significantly time-locked to stimulus onset were kept. See (1) for further details. Occasionally multiple  
15 regions-of-interest (ROI) were identified in a single cell line and treated separately. Moreover, sometimes the same cell line was  
16 imaged in multiple flies. In our analyses we treat all ROIs across all experiments separately—for simplicity, we have referred to  
17 each ROI in each experiment as a “neural recording”. For each neural recording, responses were averaged across trials, then  
18 z-scored across all timepoints. In our analyses here we have only used the stimulus periods encompassing the 10-second pure  
19 sine or pulse blocks and their surrounding pre- and post-stimulus periods.

20 The neural responses analyzed in Fig S1B,D and Fig S6B were from (2). These were collected in a similar manner as those  
21 in (1), except using pan-neuronal imaging instead of individual lines for different cell types, and with 10-s stimulus blocks  
22 presented in a stereotyped order (pulse, sine, white-noise). See (2) for details.

23 **Behavioral data.** We used publicly available naturalistic courtship data described in (3–5). In each session/ritual a virgin  
24 male and female fly were placed in the arena and allowed to interact for up to 30 minutes. If copulation occurred before 30  
25 minutes had passed the session was ended at the time of copulation. Locomotion was recorded via overhead video cameras and  
26 song through floor microphones, and subsequently processed using a combination of automated and manual segmentation  
27 and tracking. Both locomotion and the ternary (quiet, sine, pulse) song time-series were sampled at 30.03 Hz (the auditory  
28 recordings of song were initially conducted at a much higher sampling rate, then segmented and binned into 30.03 Hz sampling  
29 bins, which was the sampling rate of the video cameras used to record locomotion). Female flies were also rendered blind and  
30 pheromone insensitive (PIBL) to increase their responses to auditory stimuli. See (3) for further details on the data collection.

31 For the analyses reported in this manuscript we used 87 courtship rituals (comprising 13.4 hours of song/behavior) with  
32 wild type PIBL females and two strains of males (NM91 and ZH23), which sang more robustly than other male strains and  
33 evoked robust female locomotion. Although more courtship rituals were available, we found that including them in our analysis  
34 did not substantially improve our MA-based predictions of female behavior; and the improved predictive capacity using the  
35 MA over the LN model remained as more trials were included in the training data (Fig S13). Using 87 sessions also greatly  
36 simplified the computational resources required to generate and store the many iterations of artificial neural recordings and  
37 behavioral predictions that we performed.

38 **Fitting the encoding models.** We fit the four parameters of the MA encoding model to each neuron by minimizing the squared  
39 error between the model MA response to the sine and pulse stimuli (together with their 10-second post-stimulus periods) and  
40 the empirical calcium responses. To ensure fair comparison between the abilities of the LN vs MA models, we derived a method  
41 to parameterize the LN models by exactly the same parameters as the MA model ( $\tau_{int}, \tau_a, x_s, x_p$ ) (otherwise the LN model  
42 would have many more parameters, including each timepoint in each filter). To this end, we analytically computed the MA  
43 step response and then took its time-derivative to identify the corresponding LN filter, which was consequently parameterized  
44 by the MA parameters (see next section). For the nonlinearity  $g$  we used a signed rectifying nonlinearity in accordance with  
45 whether the empirical neural activity increased or decreased following stimulus onset. We then fine-tuned the LN filter by  
46 adjusting the four parameters through gradient descent so that the LN response captured both the onset and offset responses  
47 of the block stimuli.

48 We also fit the LN model directly to the calcium data using Ridge Regression and a sigmoidal nonlinearity. The nonlinearity  
49 was

$$50 \quad g(z) = r_{min} + (r_{max} - r_{min}) \left[ \frac{\tanh(\beta(z - z_0)) + 1}{2} \right], \quad [1]$$

51 where  $z$  is the filtered song input ( $h_s * I_s + h_p * h_s$ ). We fit the filters first without the nonlinearity, then fit the nonlinearity  
52 given the filters, and finally performed a joint optimization of both the filter and nonlinearity parameters to fine tune the fit,  
53 minimizing the squared error between the LN predictions and the mean calcium responses, and penalizing the filter weights  
54 with the same Ridge Regression parameter. We also found that using a sigmoidal nonlinearity produced similar results as a  
55 signed rectification nonlinearity. In general, however, the preceding fitting procedure in which we parameterized the LN model  
56 by the MA parameters yielded more conservative results (i.e. the LN models parameterized by the 4 MA parameters yielded  
57 a better LN prediction of female walking than the LN models fit with Ridge Regression), in particular since the LN model  
58 tended to inherit very similar timescales as the MA timescales (Fig S15).

59 **Procedure for constructing LN encoding model parameterized by MA parameters.** First we derive an analytical form of the step  
60 response of the MA neuron. For  $I_s = \Theta(t), I_p = 0$ , where  $\Theta$  is the Heaviside step function, we have

$$61 \quad a_s(t) = (1 - \exp(-t/\tau_a))\Theta(t) \quad [2]$$

62 hence

$$63 \quad \tau_{int} \frac{dr}{dt} = -r + x_s \exp(-t/\tau_a) \Theta(t). \quad [3]$$

64 Then we can write

$$65 \quad r_s^{step}(t) = h_r * x_s \exp(-t/\tau_a) \Theta(t) \quad [4]$$

66 where

$$67 \quad h_r(t) = \frac{1}{\tau_{int}} \exp(-t/\tau_{int}) \Theta(t) \quad [5]$$

68 is the exponential filter described by the dynamical system for  $r$ . That is,

$$69 \quad r_s^{step}(t) = \int_0^\infty h(t') u(t-t') dt' = \frac{x_s}{\tau_{int}} \int_0^\infty \exp(-t'/\tau_{int}) \exp(-(t-t')/\tau_a) \Theta(t-t') dt' \quad [6]$$

70 where the  $\Theta(t)$  corresponding to the filter  $h_r$  has been absorbed into the limited integration range. We can take care of the  
71 second heaviside function in the same way:

$$72 \quad r_s^{step}(t) = \frac{x_s}{\tau_{int}} \int_0^t \exp(-t'/\tau_{int}) \exp(-(t-t')/\tau_a) dt' = \frac{x_s}{\tau_{int}} \exp(-t/\tau_a) \int_0^t \exp(-t'/\tau_{int}) \exp(t'/\tau_a) dt'. \quad [7]$$

73 When  $\tau_{int} = \tau_a$  we have

$$74 \quad r_s^{step}(t) = \frac{x_s}{\tau_a} t \exp(-t/\tau_a) \quad [8]$$

75 i.e. an alpha function since the integral becomes  $t$ . Otherwise

$$\begin{aligned} 76 \quad r_s^{step}(t) &= \frac{x_s}{\tau_{int}} \exp(-t/\tau_a) \int_0^t \exp(-t'(1/\tau_{int} - 1/\tau_a)) dt' \\ &= \frac{x_s}{\tau_{int}} \exp(-t/\tau_a) \frac{\exp(-t'(1/\tau_{int} - 1/\tau_a))}{1/\tau_a - 1/\tau_{int}} \Big|_0^t \\ &= \frac{x_s}{\tau_{int}} \exp(-t/\tau_a) \frac{(\exp(-t(1/\tau_{int} - 1/\tau_a)) - 1)}{1/\tau_a - 1/\tau_{int}} \end{aligned} \quad [9]$$

77 Simplifying, we have

$$78 \quad r_s^{step}(t) = \frac{x_s}{\tau_{int}/\tau_a - 1} (\exp(-t/\tau_{int}) - \exp(-t/\tau_a)) \quad [10]$$

79 i.e. the scaled difference between two exponential filters with timescales  $\tau_{int}$  and  $\tau_a$ .

80 The sine filter is given by the derivative of the step response. When  $\tau_{int} = \tau_a$  we have

$$81 \quad h_s(t) = \frac{d}{dt} r_s^{step}(t) = \frac{x_s}{\tau_{int}} \left( \exp(-t/\tau_a) - \frac{t}{\tau_a} \exp(-t/\tau_a) \right). \quad [11]$$

82 Otherwise

$$83 \quad h_s(t) = \frac{x_s}{\tau_{int}/\tau_a - 1} \left( \frac{-1}{\tau_{int}} \exp(-t/\tau_{int}) + \frac{1}{\tau_a} \exp(-t/\tau_a) \right) \quad [12]$$

84 And similarly for the pulse filter:

$$85 \quad h_p(t) = \frac{x_p}{\tau_{int}} \left( \exp(-t/\tau_a) - \frac{t}{\tau_a} \exp(-t/\tau_a) \right) \quad [13]$$

86 when  $\tau_{int} = \tau_a$  and

$$87 \quad h_p(t) = \frac{x_p}{\tau_{int}/\tau_a - 1} \left( \frac{-1}{\tau_{int}} \exp(-t/\tau_{int}) + \frac{1}{\tau_a} \exp(-t/\tau_a) \right) \quad [14]$$

88 otherwise. Note that the  $\tau_a \neq \tau_{int}$  case converges to the  $\tau_a = \tau_{int}$  case as  $\tau_a \rightarrow \tau_{int}$ , even though the denominator in the  
89 prefactor goes to 0.

90 To construct the LN model we use these filters, combined with a signed rectification nonlinearity in accordances with the  
91 signs of the selectivities  $x_s$  and  $x_p$ . Thus, by construction the LN responses to the step inputs i.e. block song onset are identical  
92 to the MA responses. However, the offset responses following the 10-second block stimulus, while typically similar, will not  
93 necessarily be exactly matched to the MA responses, however. Therefore we adjusted the 4 parameters of the LN model using  
94 a standard gradient-descent procedure (scikit-learn's minimize function) to maximally reproduce the full block song responses  
95 over the 10-second stimulus period and 10-second post-stimulus period.

96 **Bout-duration and hand-picked feature models.** It was shown in Clemens, et al (2015) (4) that among several manually chosen  
 97 song features, time-averaged bout-duration exhibited the strongest correlation with time-averaged female walking speed, with  
 98 the correlation plateauing near a 1-minute averaging window. To verify these conclusions within our moment-to-moment  
 99 predictive analysis of female walking speed, we computed the momentary values of a battery of hand-picked song features,  
 100 time-averaged over different windows, and then used each feature individually to predict moment-to-moment female walking  
 101 speed (using either a 1-second or 1-minute forward averaging window for walking speed, as in our other analysis). Corroborating  
 102 the results of Clemens et al we found mean bout duration, averaged over about 1-4 minutes, provided the strongest prediction  
 103 of moment-to-moment female walking speed, explaining about 10-12% of the variance of the 1-second-averaged walking speed  
 104 and 12-15% of the variance of the 1-minute-averaged walking speed (Fig S14). (As in our other analyses, the bout-duration  
 105 regressor was fit on 80% of the trials and the prediction and variance explained computed on a test/held-out 20% of the trials,  
 106 and finally averaged over 30 training/test splits). Note that while (4) showed that mean bout duration could be estimated with  
 107 a single-neuron filter applied directly to the envelope of song acoustic envelope waveform, combined with a set of nonlinearities  
 108 and an integrator, we did not explicitly implement this pseudo-neural model, since its end result was to provide a highly  
 109 accurate estimate of mean bout duration (Pearson correlation = 0.93), which we instead computed directly from the ternary  
 110 song representation.

111 **Direct song-to-locomotion filter.** To estimate how much female locomotion variance could be explained by direct linear filters  
 112 on sine and pulse song, we represented both a sine and pulse filter,  $h_s$  and  $h_p$  as a sum of 16 raised cosine basis functions:

$$113 \quad b_i(t) = \frac{1}{2} \cos(a \log(t + c) - \phi_i) + \frac{1}{2} \quad [15]$$

114 where we set  $a = 6$ ,  $c = 0$ , and  $\phi_i = i\pi/2$ , which spanned timescales up to approximately 1 minute. Filters were then  
 115 represented as

$$116 \quad h_s(t) = \sum_{i=0}^{15} w_s^i b_i(t) \quad [16]$$

117 and similarly for the pulse filter. We then fit the basis function weights  $\{w_s^i\}, \{w_p^i\}$  using Ridge Regression ( $\alpha = 10$ ) to  
 118 minimize the squared error between female locomotion and the summed filter outputs (Fig S17).

119 **Fitting the neural-to-locomotion readout.** Except when otherwise mentioned, each encoding model and variation we investigated  
 120 produced a 224-dimensional time-series (the number of original calcium recordings) accompanying each of the 87 courtship  
 121 sessions. Each recording was a deterministic function of the courtship songs, as all encoding models were deterministic. As our  
 122 locomotion variable we used the total walking speed of the fly, which could comprise both forward and lateral components  
 123 (relative to the fly’s body axis), and which was as or more predictable than purely forward or purely lateral motion (Fig S4).

124 To predict locomotion we first “forward-smoothed” the locomotion time-series (i.e. total walking speed at any timestep)  
 125 by replacing the walking speed at each timestep  $t$  with its time average from  $t$  to  $t + \Delta T$ . Our motivation for smoothing  
 126 only in the forward direction was to not contaminate our measure of ongoing/future locomotion with past features of female  
 127 locomotion that could have influenced song at time  $t$ .

128 For each encoding model or variation we trained a linear readout from the artificial population neural activity at time  $t$   
 129 (which encodes song history up till time  $t$ ) to the forward-smoothed female locomotion variable at time  $t$ . We trained the  
 130 readout (using Ridge Regression with  $\alpha = 10$ ) on 80% of the courtship sessions and tested the readout across all timepoints in  
 131 the remaining 20% of courtship sessions, which contained different flies. In general, female flies walked even before male song  
 132 began. To focus on song-modulated locomotion, we therefore excluded from training/testing (1) all timepoints occurring before  
 133 the first non-quiet song timepoint, (2) any timepoint occurring after more than 30 seconds of pure quiet had passed. (Note  
 134 that this second condition was extremely rare, since the mean quiet period was only 2.34 seconds [Fig S4], with substantially  
 135 longer quiet periods occurring with very low probability.) To compute the final score for each encoding model we performed  
 136 this procedure for 30 random 80/20 splits of the 87 sessions into training/test sessions and reported the variance explained in  
 137 held-out sessions, averaged across splits.

138 **Song shuffling procedure.** Songs were shuffled (Fig 1J) as follows. Songs could not be randomly assigned to different courtship  
 139 sessions directly because sessions had different lengths. Instead, we concatenated all songs, then randomly circularly shifted  
 140 them, then re-segmented the songs into individual sessions using the empirical session durations. This procedure retains  
 141 temporal correlations in song while breaking correlations between song and locomotion.

142 **Estimating song information.** For a given MA model neuron we estimated the information about preceding song it contained  
 143 in its instantaneous activity level by presenting the entire courtship song extracted in each of the 87 sessions to the neuron  
 144 (excluding any initial quiet period at the start of a session before singing began), and then creating a histogram of responses  
 145 (using 16 evenly spaced bins ranging from 0 to the maximum neural response level) aggregating over all songs and timepoints  
 146 (yielding 1,448,116 timepoints total binned into 16 bins). We then computed the Shannon entropy of the resulting histogram:

$$147 \quad H[r] \equiv - \sum_i f_i \log f_i \quad [17]$$

148 where  $f_i$  are the estimated fraction of timepoints in each bin. While this quantity is in general a biased estimate of entropy,  
149 we do not expect our results to be significantly affected, since the histogram estimate is built from over 1 million timepoints.  
150 Values reported in the figures are relative to the Shannon entropy of the equivalent uniform distribution, hence range between  
151 0 and 1.

152 **Stimulus-invariant adaptation model.** The stimulus-invariant version of the MA encoding model was given by

$$\begin{aligned} \tau_{int} \frac{dr}{dt} &= -r + x_s(1-a)I_s(t) + x_p(1-a)I_p(t) \\ \tau_a \frac{da}{dt} &= -a + I_s(t) + I_p(t) \end{aligned} \tag{18}$$

154 i.e. reproducing the original MA model except with only a single adaptation variable  $a$ .

155 **Greedily constructed behaviorally predictive MA population.** Our greedily constructed behaviorally predictive MA population  
156 was built in the following way. We first defined a finite set of parameter values to select from, since this procedure amounts  
157 to an optimization requiring training a readout and predicting locomotion over 30 training/test splits of a large behavioral  
158 dataset for every iteration, making it infeasible to easily search over a continuous parameter space. The range of parameters we  
159 considered was  $\tau_{int} \in \{0.1, 0.5, 1, 2, 5, 10, 30, 60, 120\}$  s,  $\tau_a \in \{0.1, 0.5, 1, 2, 5, 10, 30, 60, \infty\}$  s,  $x_s \in [0, 0.5, 1]$ ,  $x_p = 1 - x_s$ . Note  
160 that we did not include negative selectivities, which correspond to empirical neural activity that decreases in response to song,  
161 since this does not affect the ability to predict behavior due to the ability of the linear readout to absorb arbitrary signs and  
162 scalings of the neural activity.

163 We first generated an artificial recording containing one neural response for every combination of parameters. Next, we  
164 identified the single neuron that could best predict female locomotion in held-out courtship sessions. We then iterated over  
165 selecting the next best neuron, that if added to the existing population, maximally increased female locomotion variance  
166 explained in held-out courtship sessions, averaged over training/test splits, up to 50 neurons.

167 **Selection of songs for accumulation and manifold analysis.** To investigate accumulator-like dynamics of the MA neurons we  
168 presented 1-minute song segments taken from the courtship rituals used in the rest of our analyses. To extract song segments,  
169 we segmented all songs across all 87 sessions into song segments lasting at least 1 minute and separated by at least 5 seconds of  
170 quiet. For any song segments selected as such that extended beyond 1 minute, only the first minute was used. This yielded 108  
171 unique natural song segments, which we presented to the model neurons studied in Fig 3.

172 For the manifold analysis we curated a collection of song segments of 40 different durations  $T$  ranging from 1s to 300s,  
173 spaced either linearly (Fig 4B-C) or logarithmically (Fig 4D,G). To extract segments of length  $T$ , each courtship session was  
174 segmented into segments of duration  $T$  s or greater separated by at least  $T$  s of no singing, then truncated to have length  
175 exactly  $T$ . Principal component analysis in Fig 4E-G was performed on the responses of the fast-adapt-slow-integrate 20-neuron  
176 MA population to these song segments.

177 **Encoding models reproducing offset responses.** To allow our encoding models to reproduce the occasional sine-offset responses  
178 seen in the calcium recordings in (1) (Fig S3), we used an MA model in which quiet periods during song were treated as their  
179 own song mode (excluding the initial quiet period at the beginning of each session), which allowed us to simply augment the  
180 MA model with a third selectivity  $x_q$  and adaptation variable  $a_q$  that had the same structure the sine and pulse adaptation  
181 selectivities and adaptation variables (Fig S17). We also considered an LN model, named “LN-ReLu-Flex” (Fig S17), in which  
182 the nonlinearity was a piecewise linear function (with one hinge at the origin) that was not constrained to be strictly monotonic.

## 183 References

- 184 1. CA Baker, et al., Neural network organization for courtship-song feature detection in drosophila. *Curr. Biol.* **32**, 3317–3333  
185 (2022).
- 186 2. DA Pacheco, SY Thiberge, E Pnevmatikakis, M Murthy, Auditory activity is diverse and widespread throughout the central  
187 brain of drosophila. *Nat. neuroscience* **24**, 93–104 (2021).
- 188 3. P Coen, et al., Dynamic sensory cues shape song structure in drosophila. *Nature* **507**, 233–237 (2014).
- 189 4. J Clemens, et al., Connecting neural codes with behavior in the auditory system of drosophila. *Neuron* **87**, 1332–1343  
190 (2015).
- 191 5. AJ Calhoun, JW Pillow, M Murthy, Unsupervised identification of the internal states that shape natural behavior. *Nat.*  
192 *neuroscience* **22**, 2040–2049 (2019).

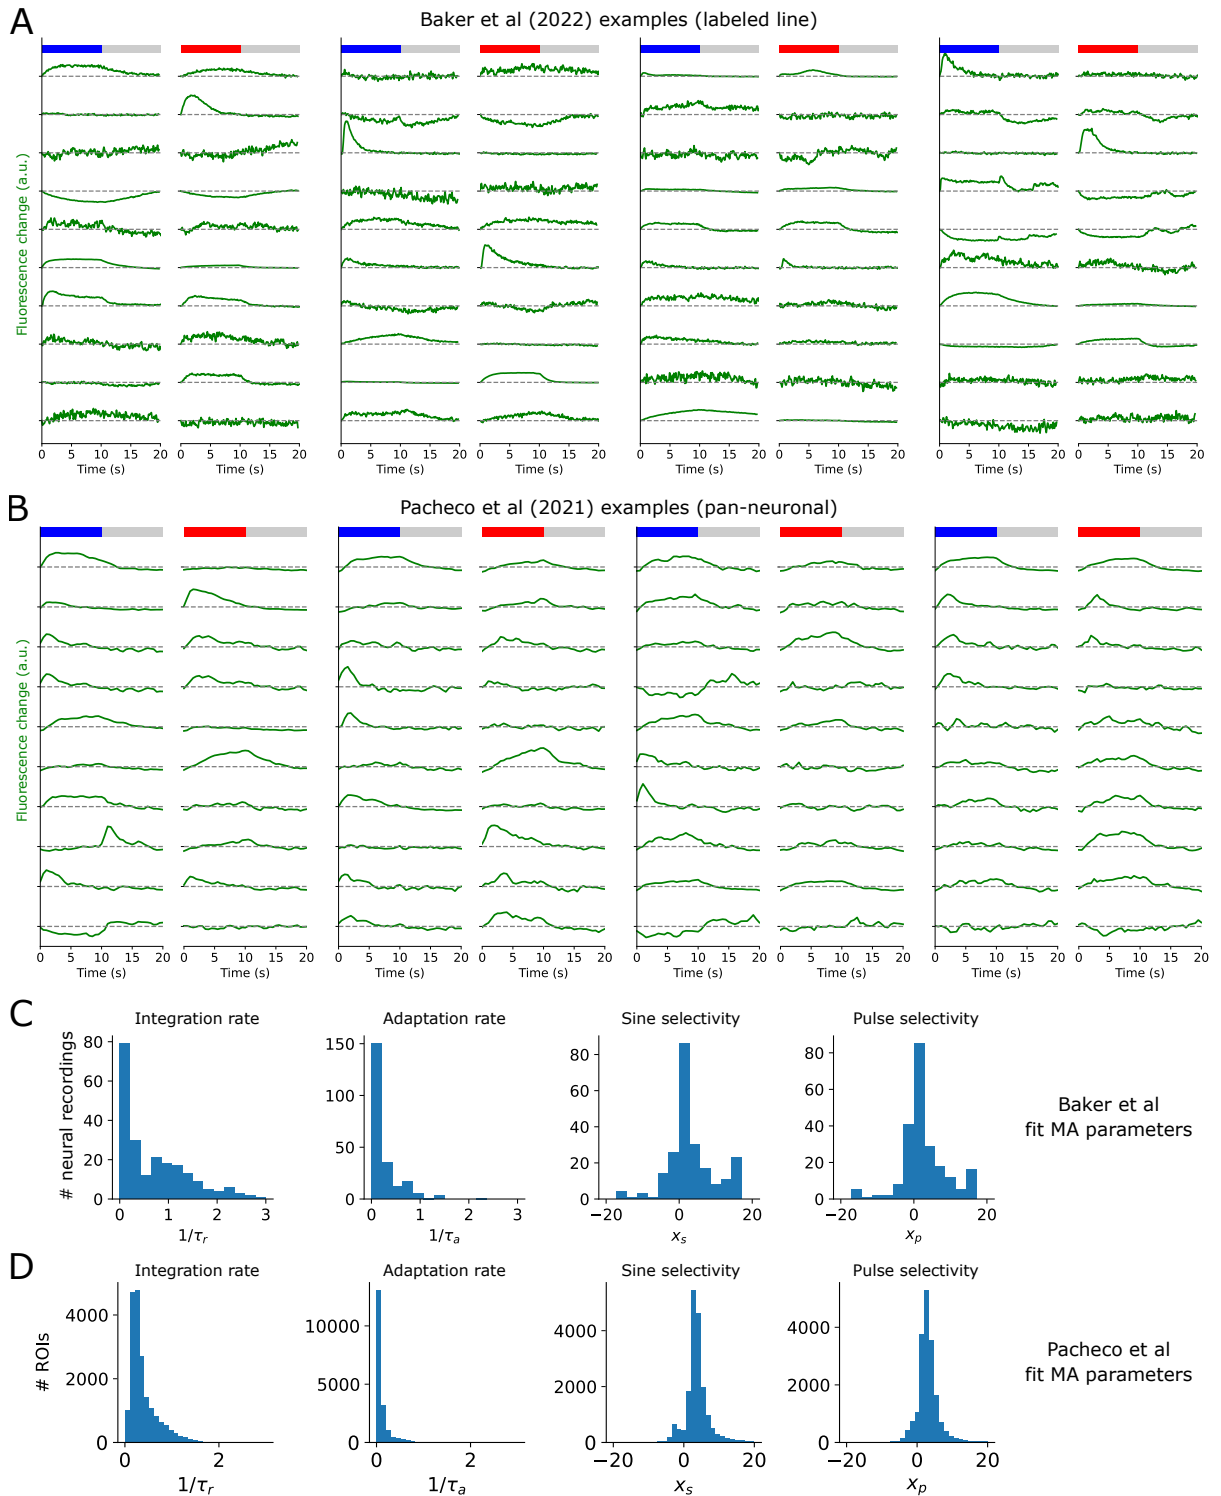

**Fig S1. Example labeled line and pan-neuronally imaged calcium response to block song.** A. Example responses from a diverse selection of neurons in the labeled line data (Baker et al 2022) (1). Every pair of responses to the sine and pulse blocks corresponds to one neural recording. B. Example responses from a selection of example ROIs extracted from the pan-neuronal imaging data in Pacheco et al. 2021. C. Distributions of MA parameters fit to all neurons in Baker et al 2022 dataset (N=224). D. Distributions of MA parameters fit to all ROIs in Pacheco et al 2021 dataset (N=19036) (2).

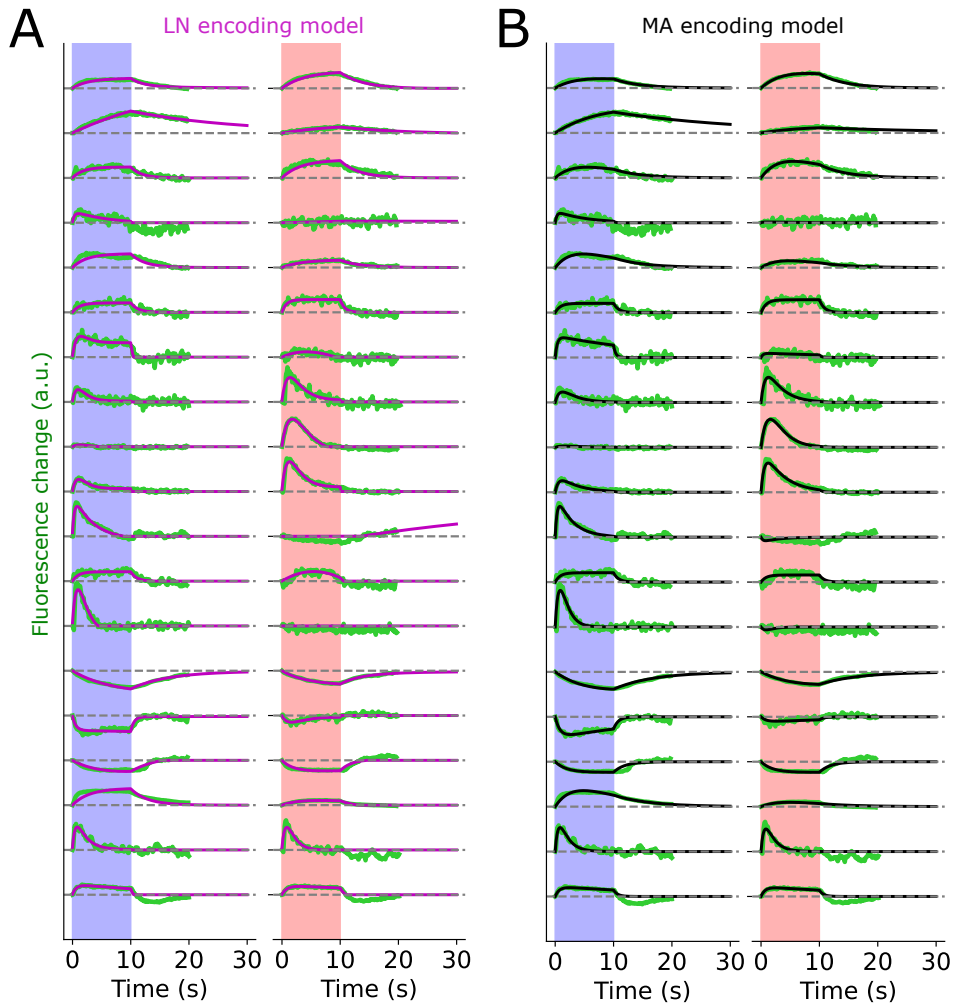

**Fig S2: Larger example set of encoding model fits to neural recordings.** A. Example MA fits (black) to song-element responses (green) recorded in Baker et al 2022 (1). B. As in A but for LN encoding models with filters parameterized by the MA parameters. Formatting as in Fig 1E.

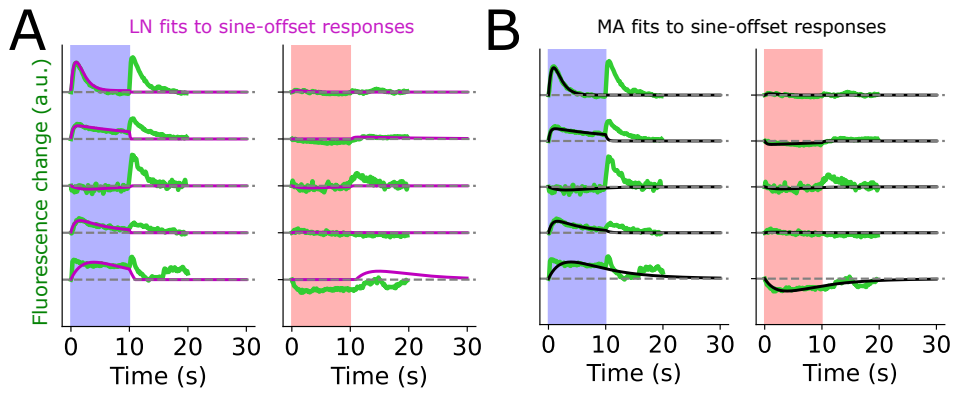

**Fig S3: Example sine-offset responses and model fits.** A. Example calcium responses and LN fits (magenta). B. As in A but with MA fits.



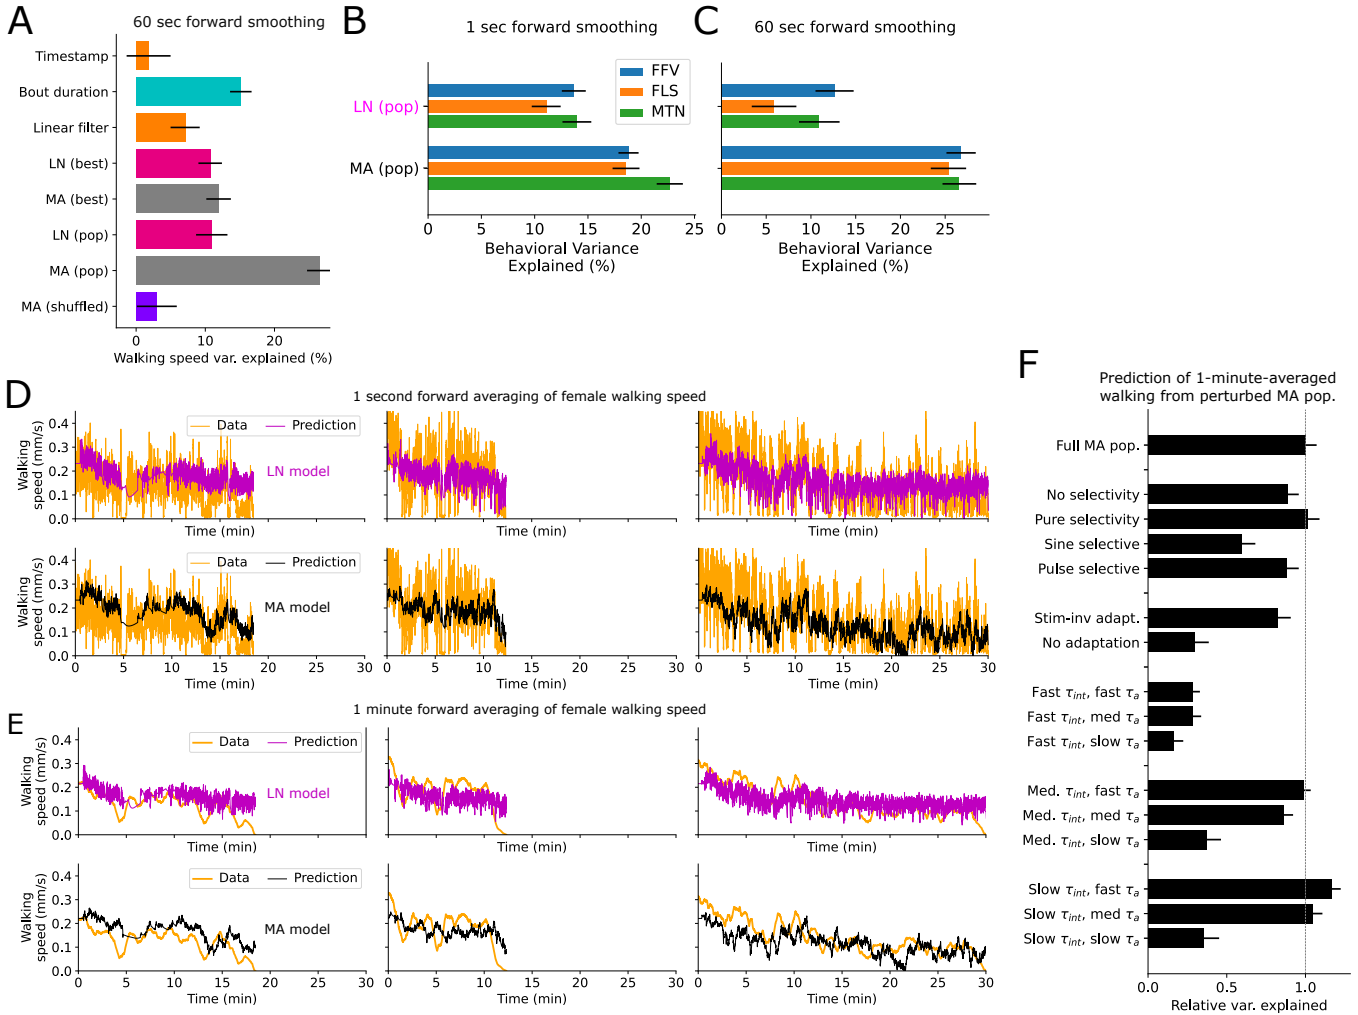

**Fig S4: Variance explained for different female behavioral variables and over different smoothing windows.** A. As in Fig 1J, but predicting female walking speed forward-averaged over a 60 s window. B. Comparison of female forward velocity (FFV), absolute female lateral speed (FLS) (relative to the female's body axis), and total female motion (MTN) i.e. walking speed, predictions using LN or MA populations, after forward-smoothing female behavior in a 1-second window. C. As in B but for a 60s window. D. Additional examples of walking speed predictions from the LN vs MA population models for three different held-out trials (as in Fig 1H). E. As in D, but using a 1-minute forward averaging window for female walking speed. F. As in Fig 2A, but for 1-minute-forward-averaged female walking speed.

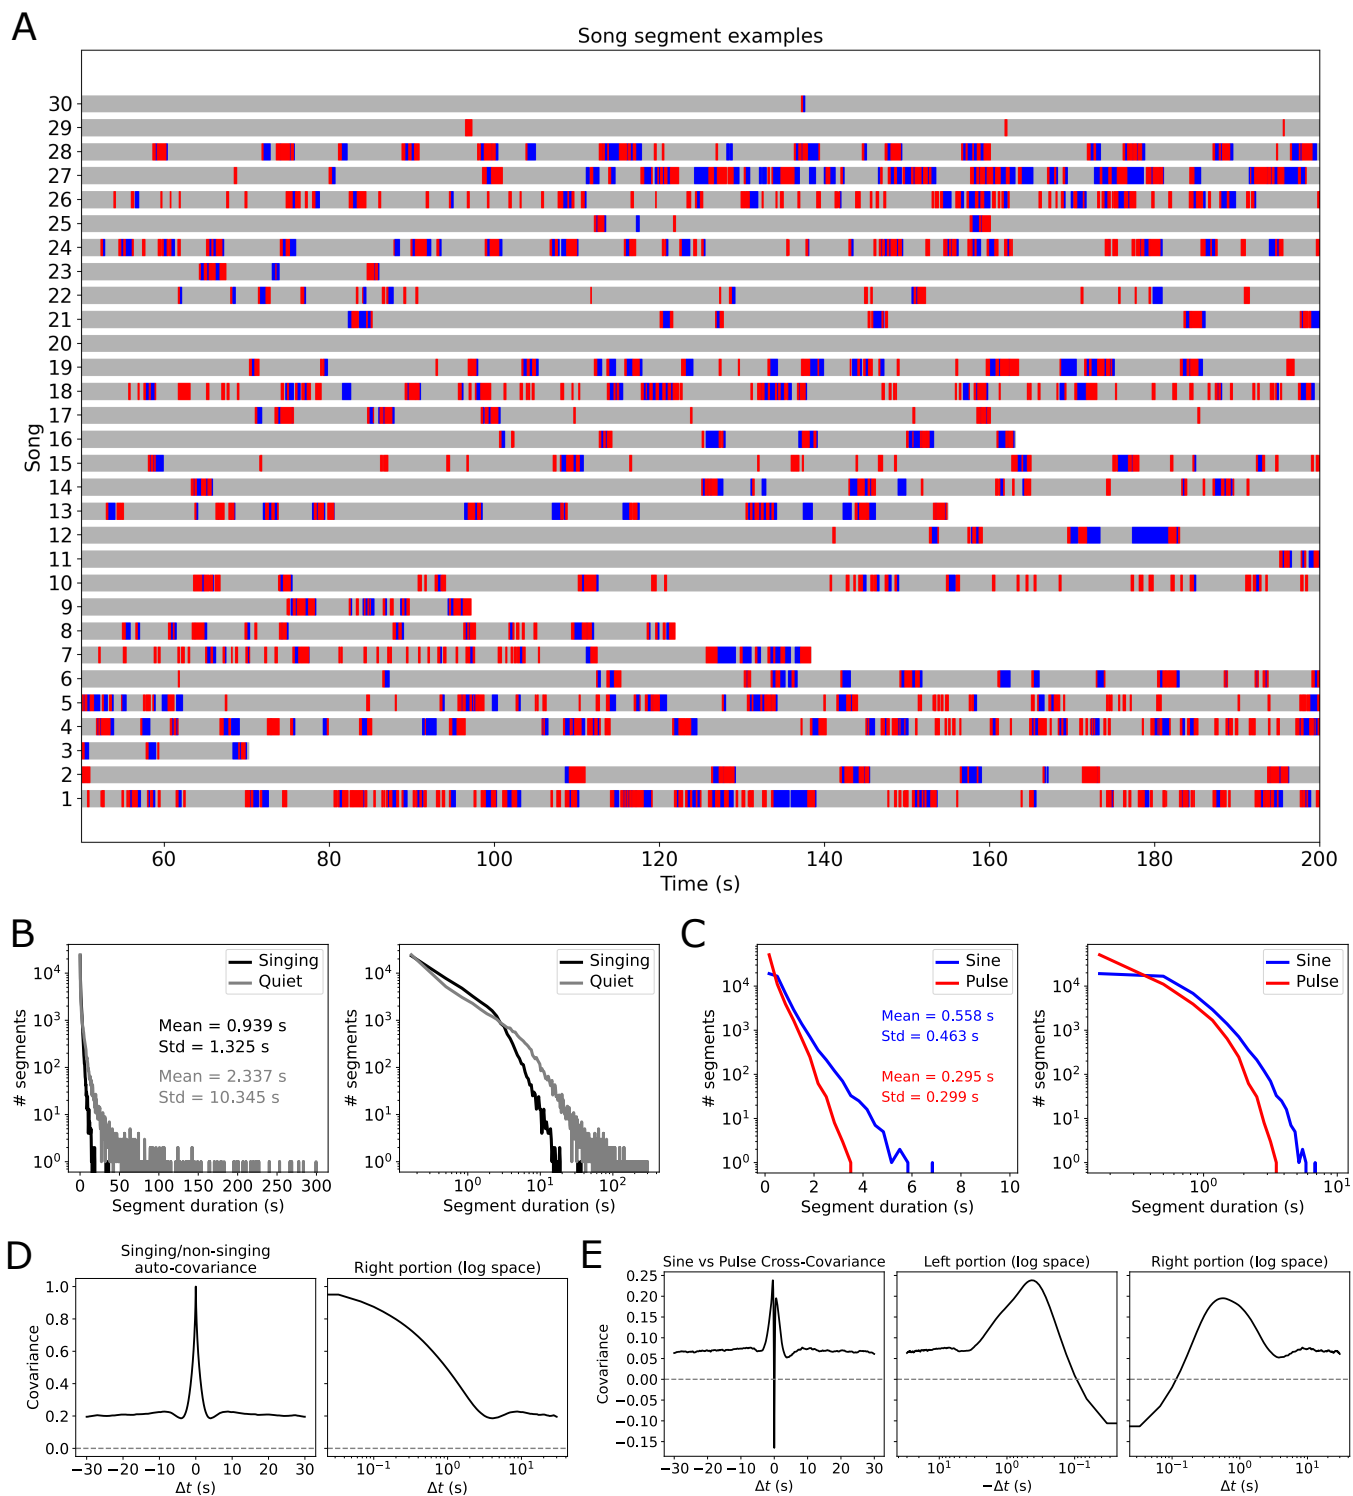

**Fig S5: Song examples and statistics.** A. Example songs; each row corresponds to a courtship ritual with a unique pair of virgin flies. Gray = quiet, blue = sine song, red = pulse song. Songs ending before 200s indicate that copulation occurred. B. Duration distribution of contiguous singing or quiet segments. Left plot is semi-log, right plot is log-log. C. As in D but for contiguous sine or pulse segments. D. Autocovariance function of singing vs non-singing, computed by aggregating all songs without normalization. The apparent nonzero offset likely partly reflects individual variability. E. Cross-covariance functions between binarized sine and pulse song, computed by aggregating all songs.

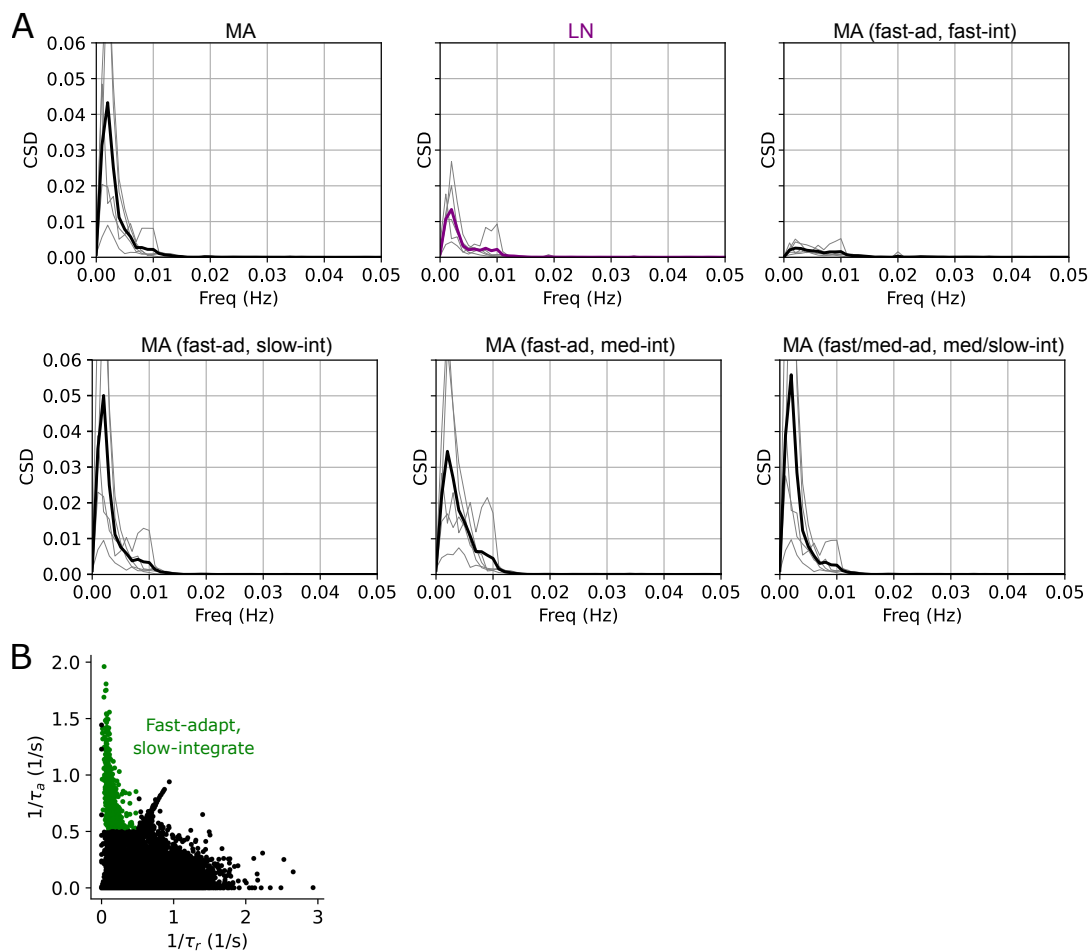

**Fig S6: Target/prediction alignment for different encoding models and fast-adapt slow-integrate region.** A. Cross-spectral density between target (female walking speed, 1-s forward smoothing) and prediction for held-out courtship sessions, for 5 training/test set splits (thick line shows average). The final panel (fast/med-ad, med/slow-int) uses  $\tau_a$  sampled uniformly from 100 ms to 20 s and  $\tau_{int}$  from 2 to 120 s. B. MA fit parameters using Pacheco et al (2021) pan-neuronal imaging data (2), with fast-adapt-slow-integrate regime highlighted.

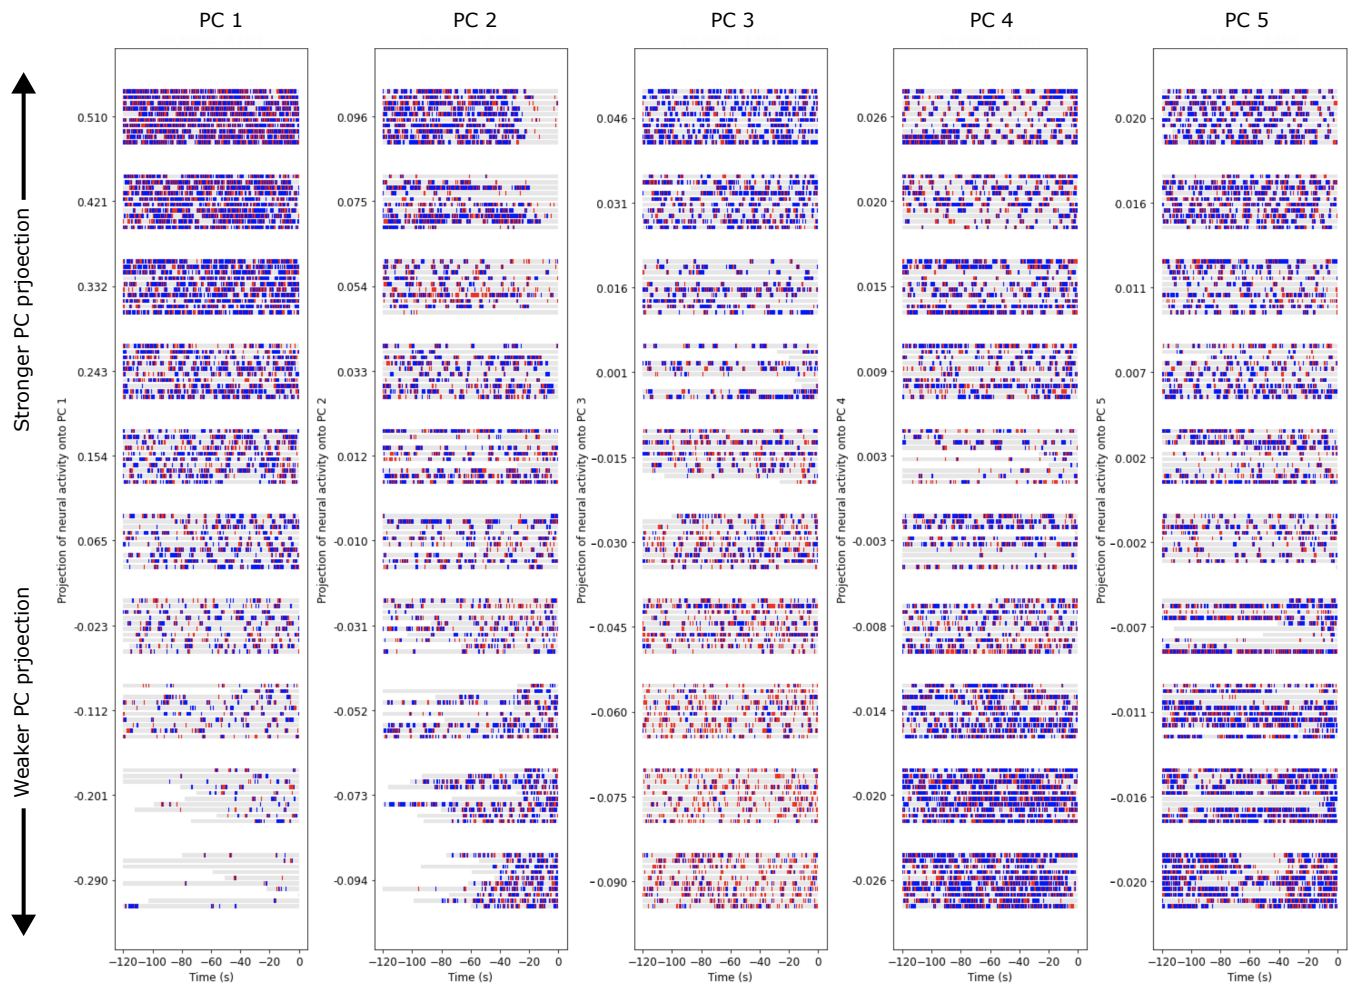

**Fig S7: Example songs driving activity along top 5 neural PCs of the 20-neuron fast-adapt-slow-integrate MA code.** Values of model neural activity projected onto each PC was split into deciles (using all timepoints across all songs). For each decile of each PC 10 songs/timepoints across the dataset were randomly sampled, and the last 2 minutes of song preceding that timepoint were plotted.

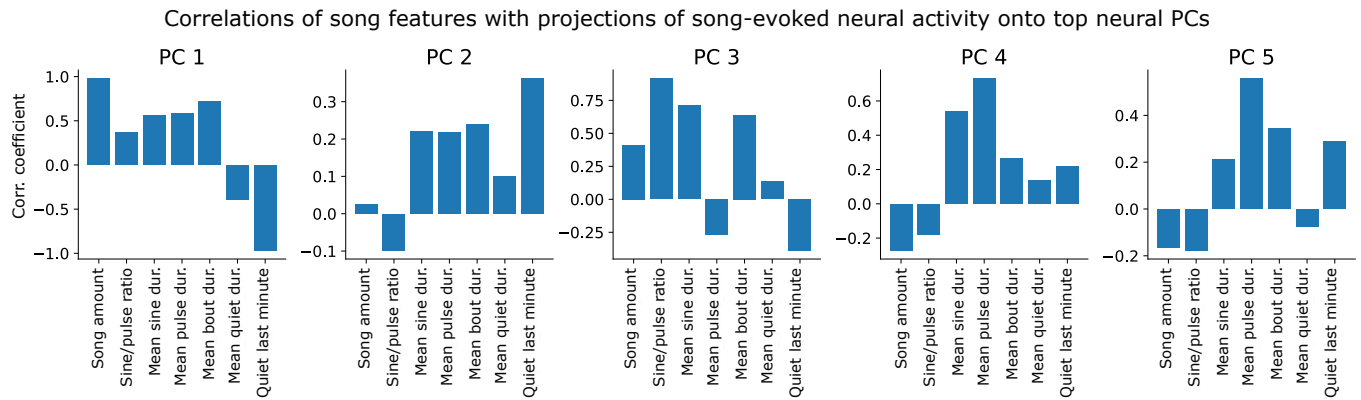

**Fig S8: Neural PCs interpreted in terms of song features.** For each song the values of several hand-picked features were computed. These were then correlated with projections of song-evoked MA population activity onto the top 5 neural PCs.

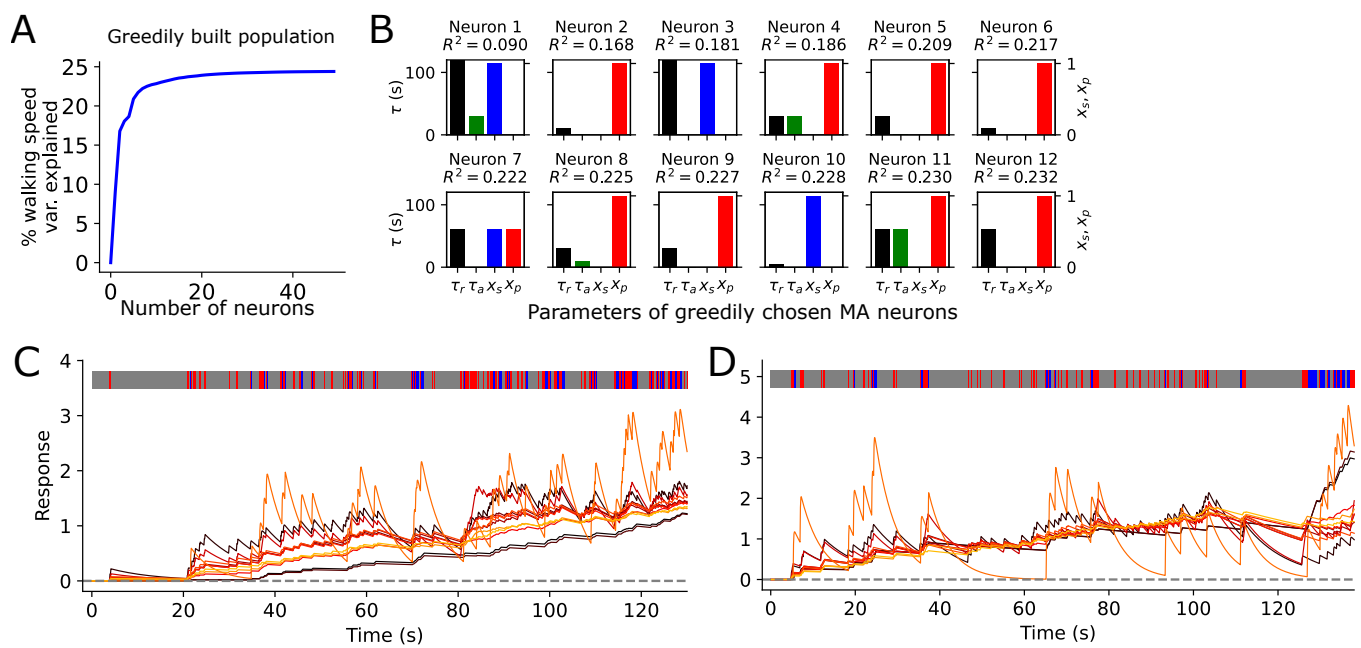

**Fig S9: Greedily constructed MA population.** A. Female walking speed variance (1-second forward averaging) explained in held-out courtship sessions from small population of MA neurons built up by greedily or iteratively choosing the next most predictive neuron to included in the population. B. Parameters of top 12 neurons recruited in the greedily constructed population in A. C. Population response to an example song segment. Each trace is the time-course of one neuron. D. As in C but for a different song.

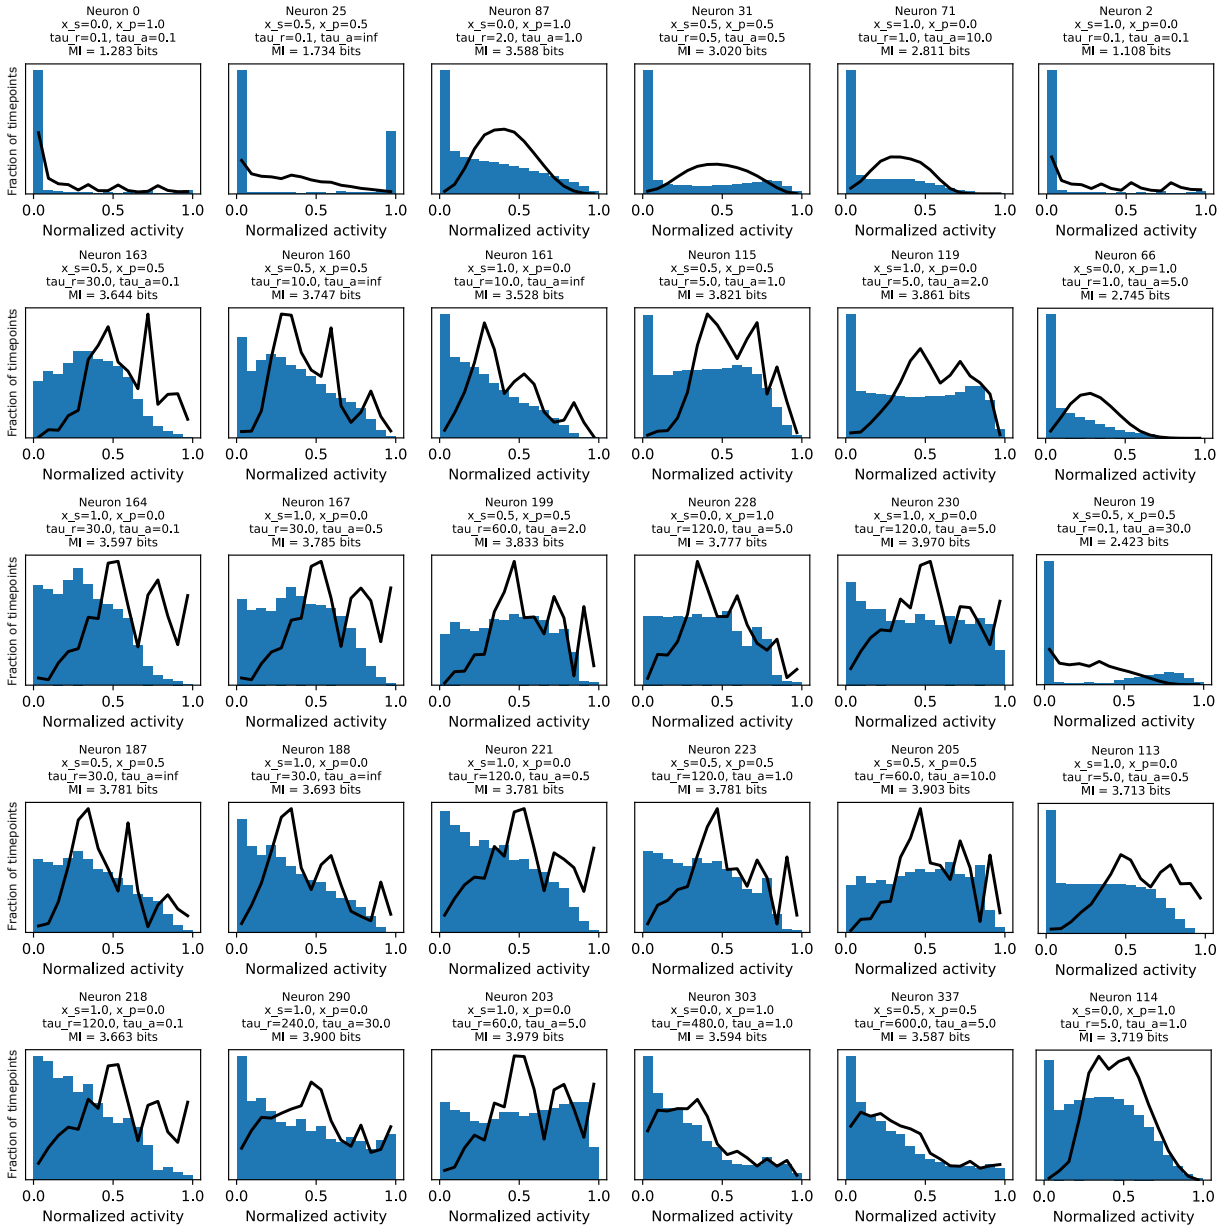

**Fig S10: Activity distributions of additional example model MA neurons.** Blue histograms show responses to natural song, binned into 16 bins. Black traces are histograms of responses to scrambled song. Activity is normalized to maximum observed response.

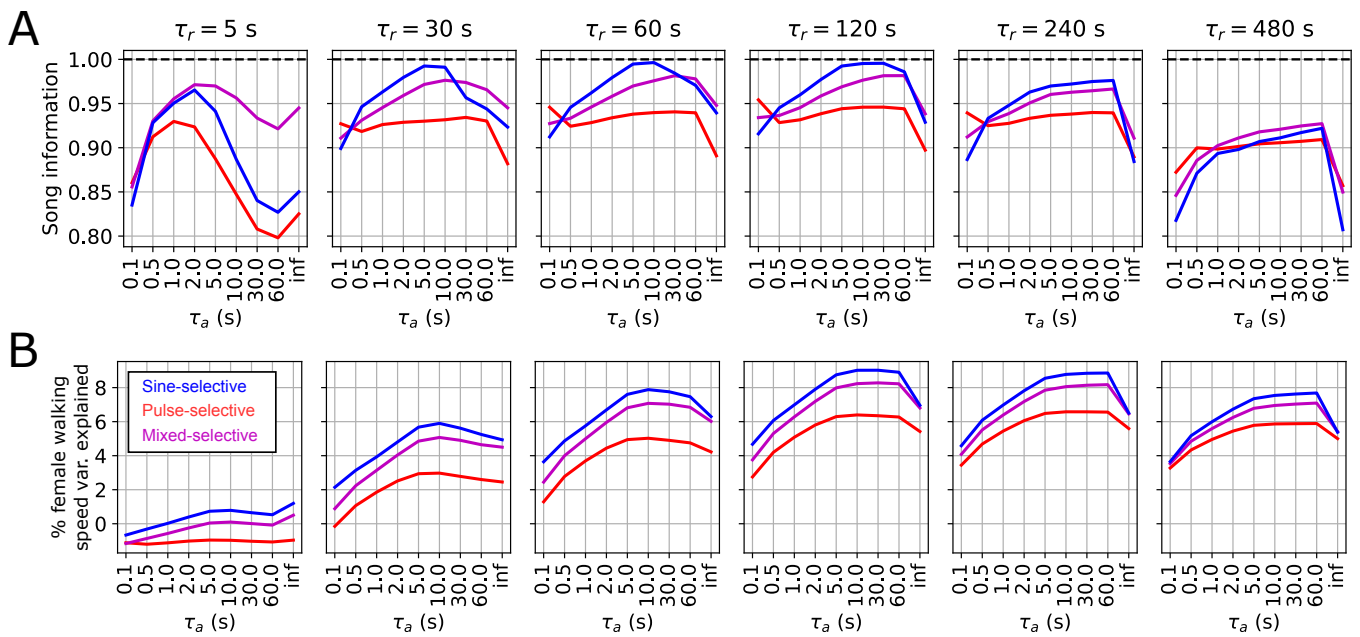

**Fig S11: Song information and walking speed variance explained by single MA neurons.** A. Mutual information between song and single MA neuron responses as a function of MA neuron parameters. Each panel shows a set of neurons with the indicated  $\tau_{int}$ . Blue lines indicate sine-selective neurons ( $x_s = 1, x_p = 0$ ), red lines pulse-selective neurons ( $x_s = 0, x_p = 1$ ) and magenta lines mixed-selective neurons ( $x_s = x_p = 0.5$ ). B. As in A except depicting female walking speed variance explained by any single MA neuron, vs the MA neuron parameters.



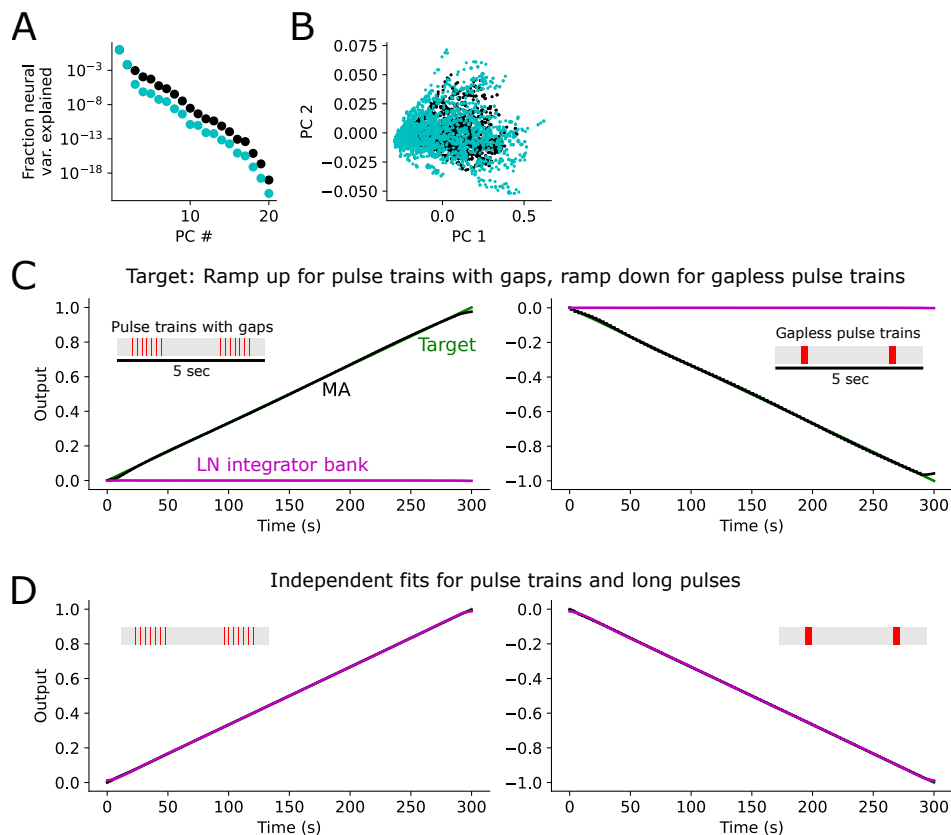

**Fig S12: Linear projections of song-evoked model neural population responses.** A. Fraction of variance explained by principal components of population response to example natural song (black) segments vs song segments that have been scrambled to remove temporal correlations (cyan). B. Song-evoked responses projected onto top 2 PCs for natural vs scrambled songs. C. Linear projections of MA vs LN integrator bank trained (Ridge Regression) to reproduce an increasing response to trains of 5 pulses interleaved with gaps (left) and a decreasing response to trains of 5 contiguous pulses. Here the MA model almost perfectly matches the target, unlike the LN model. This means that the MA model can distinguish pulse trains with vs without gaps, but the LN model cannot (because of its slow time constant). D. As in C except with independent training to each scenario. Here both the MA and LN model match the target.

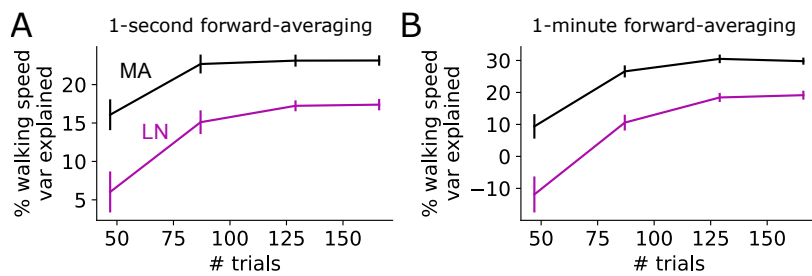

**Fig S13: Female walking speed variance explained vs number of trials.** A. Walking speed variance explained using artificial neural recordings generated by MA and LN population encoding models (LN model fit using the MA-step-response-matching procedure), using 1-second forward averaging of female walking speed. Error bars show standard error over 30 random train/test splits. B. As in A but using 1-minute forward averaging of female walking speed. In each plot the first 47 trials came from the male NM91 strain, the next 40 from ZH23, the next 42 from CarM03, and the final 37 from ZW109 (3).

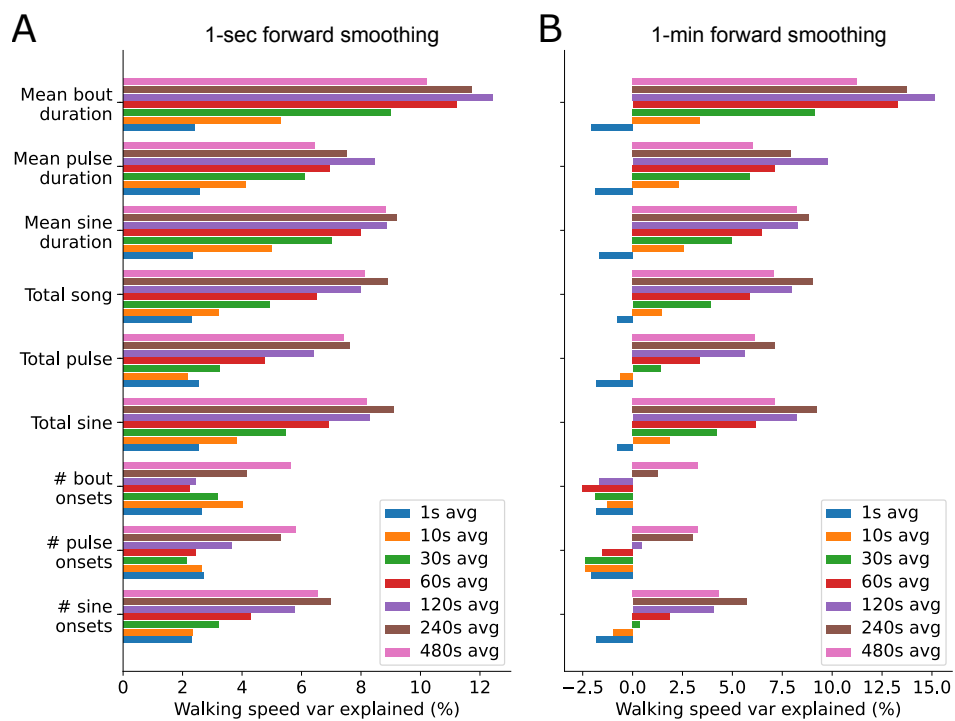

**Fig S14: Prediction of female locomotion from hand-picked song features.** A. Female walking speed variance explained (using 1-second forward smoothing) from a range of song features, estimated over several windows preceding the timepoint of the prediction. Variance explained is computed by averaging over 30 training/test splits of the data. B. As in A but using 1-minute forward smoothing.

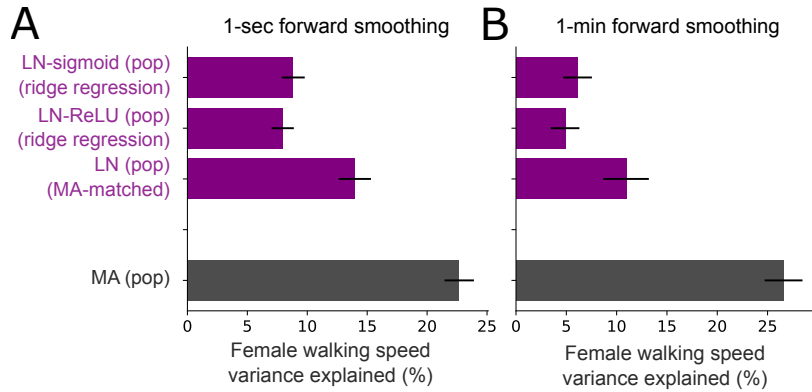

**Fig S15: Prediction of female locomotion from LN encoding population fit to neural data using ridge regression.** A. Female walking speed variance explained by different versions of the LN model, and from the MA model. LN-sigmoid: LN model fit with ridge regression using sigmoid nonlinearity. LN-ReLU: LN model fit with ridge regression using ReLU nonlinearity. B. As in A but predicting female walking speed forward-smoothed with a 1-minute window. This figure shows that the MA-matching procedure for fitting the LN model yielded more conservative results (better female walking speed prediction) than using ridge regression.

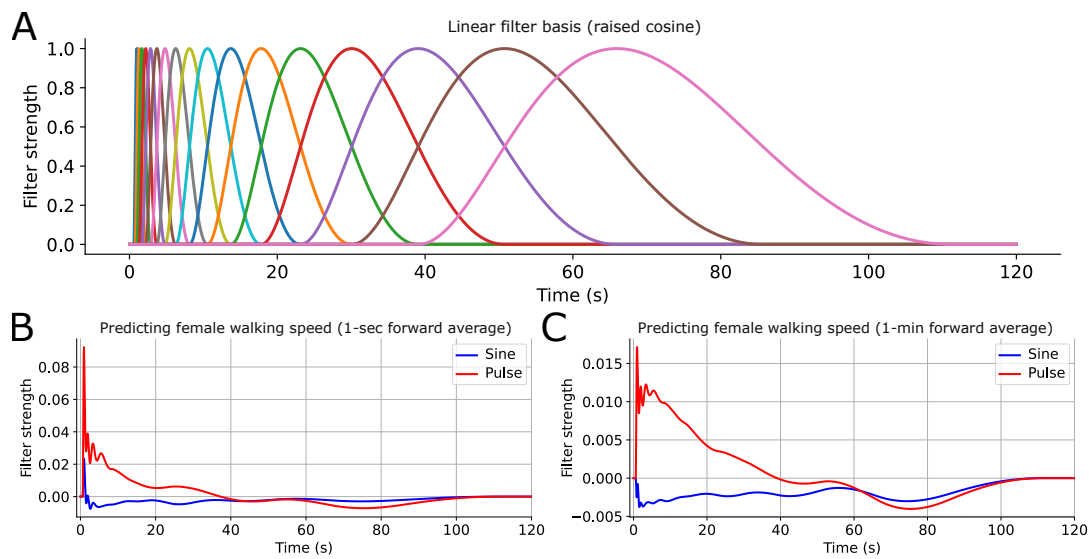

**Fig S16: Song-to-female-locomotion linear filter.** A. Basis functions (17 raised cosine functions). B. Sine- and pulse-filter reconstruction predicting female walking speed processed via a 1-second forward averaging window. C. As in B but for using a 1-minute forward averaging window.

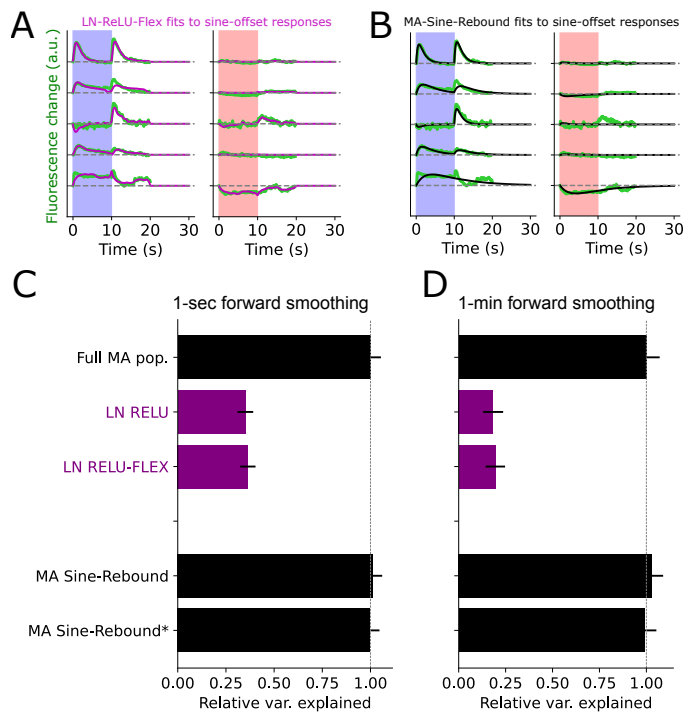

**Fig S17: Example sine-offset responses and model fits by MA-Sine-Rebound and LN-ReLU-Flex models.** A. Example sine-offset responses and fits with the “LN-Relu-Flex” model, in which the nonlinearity was a piecewise linear function that was not constrained to be strictly monotonic. B. As in A but for an MA model in which quiet was treated as its own song mode. C. As in Fig 1J and 2A, predicting female walking speed smoothed over 1-second into the future. D. As in A but using a 1-min smoothing window. MA-Sine-Rebound\* refers to model responses that treat pulse segments that follow sine as an additional unique song mode.
